# Supplementary material
Source: publisher figshare collection journal article supplement (https://sage.figshare.com/ndownloader/files/22964213)

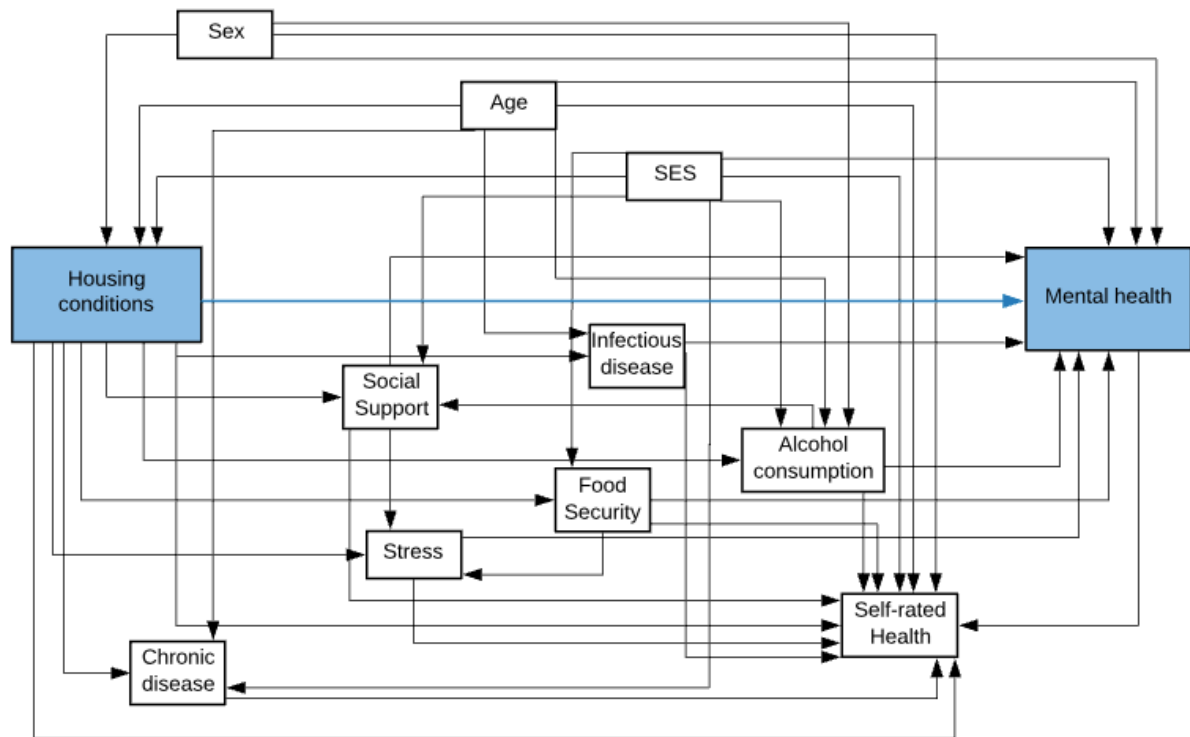

Figure 3 - DAG of the causal pathway between housing conditions and mental health

Supplement: Supplementary file 1 [file 22964213]
